# Supplementary material for: Solamargine acts as an antiviral by interacting to MZF1 and targeting the core promoter of the hepatitis B virus gene
Source: PubMed Central journal article supplement (PMC11346786; doi:10.18632/aging.206047), 2024-08-10
Supplement: aging-16-206047-s001.pdf [file aging-16-206047-s001.pdf]

## SUPPLEMENTARY MATERIAL

### Supplementary Material 1. The sequence of pUC-HB-CepUC19-HBV-Ce.

The sequence of the genome which contained 1.24-fold HBV genome AATTTGTCCTGGCTATCGCTGGATGTGTCTGCGGCGTTTTATCATATTCCTCTTCATCCTGCTGCTATGCCTCATCTTCTTGTGGTTCTTCTGGACTACC AAGGTATGTTGCCCCGTTTGTCTCTACTTCCAGGAACATCAACTACCAGCACGGGACCATGCAAGACCTGC ACGATTCCTGCTCAAGGAACCTCTATGTTTCCCTCTTGTGTGCTGTACAAAACCTTCGGACGGAACTGCACT TGTATTCCCATCCCATCATCCTGGGCTTTCGCAAGATTCCTATGGGAGTGGGCCTCAGTCCGTTTCTCCTGG CTCAGTTTACTAGTGCCATTTGTTCAGTGGTTCGTAGGGGCTTTCCTCCCACTGTTTTGGCTTTCAGTTATATGGA TGATGTGGTATTGGGGGCCAAGTCTGTACAACATCTTGAGTCCCTTTTTACCTCTATTACCAATTTTCTTTTG TCTTTGGGTATACATTTGAACCCTAATAAAAACCAACGTTGGGGCTACTCCCTTAACTTCATGGGATATGTA ATTGGAAGTTGGGGTACTTTACCGCAGGAACATATTGTAATAAACTCAAGCAATGTTTTCGAAAACCTGCC TGTAATAAGACCTATTGATTGGAAAGTATGTCAAAGAATTGTGGGTCTTTTGGGCTTTGCTGCCCCTTTTAC ACAATGTGGCTATCCTGCCTTAAATGCCTTTATATGCATGTATACAATCTAAGCAGGCTTTCCTTCTCGCC AACTTACAAGGCCTTCTGTGTCAACAATATCTGAACCTTACCCCGTTGCCCGGCAACGGTCAGGTCCTCTG CCAAGTGTGCTGACGCAACCCCACTGGATGGGGCTTGCCATAGGCCATCGGCGCATGCGTGGAACTT TGTGGCTCCTCTGCCGATCCATACTGCGGAACTCCTAGCAGCTTGTGTTTGTCTCGCAGCCGGTCTGGAGCGA AACTTATCGGGACTGACAACTCTGTTGTCCTCTCTCGGAAATACACCTCCTTTCATGGCTGCTAGGGTGTG CTGCCAACTGGATCCTGCGCGGGACGTCCTTTGTCTACGTCCCGTCGGCGCTGAATCCCGCGGACGACCCG TCTCGGGGCCGTTTGGGCCTCTACCGTCCCCTTCTTCATCTGCCGTTCCGGCCGACCACGGGGCGCACCTCT CTTTACGCGGTCTCCCGTCTGTGCCCTTCTCATCTGCCGACCGTGTGCACTTCGCTTCACTCTGCACGTCG CATGGAGACCACCGTGAACGCCACCAGGTCTTGCCCAAGGTCTTACATAAGAGGACTCTTGGACTCTCAG CAATGTCAACGACCGACCTTGAGGCATACTCAAAGACTGTTTGTGTTAAGGACTGGGAGGAGTTGGGGGA GGAGATTAGGTTAAAGGTCTTTGTACTAGGAGGCTGTAGGCATAAATTGGTCTGTTCAACAGCACCATGCA ACTTTTTACCTCTGCCTAATCATCTCATGTTTCATGTCTACTGTTCAAGCCTCAAGCTGTGCCTTGGGTGG CTTTGGGGCATGGACATTGACCCGTATAAAGAATTTGGAGCTTCTGTGGAGTTACTCTTTTTTGCCTTCT GACTTCTTTCCTTCTATTTCGAGATCTCCTCGACACCGCCTCTGCTCTGTATCGGGAGGCCCTTAGAGTCTCCG GAACATTGTTACCTCACCATACAGCACTCAGGCAAGCTATTCTGTGTTGGGGTGAGTTGATGAATCTGGC CACCTGGGTGGGAAGTAATTTGGAAGACCCAGCATCCAGGGAATTAGTAGTCAGCTATGTCAATGTTAATA TGGGCCTAAAAATCAGACAACCTATTGTGGTTTCACATTCCTGTCTTACTTTTGGAAAGAGAACTGTTCTTG AGTATTTGGTGTCTTTTGGAGTGTGGATTCGCACTCCTCCCGCTTACAGACCACCAATGCCCTATCTTAT CAACACTTCCGGAAACTACTGTTGTTAGACGACGAGGCAGGTCCCCTAGAAGAAGAACTCCCTCGCCTCGC AGACGAAGGT.
