# Supplementary material for: Solamargine acts as an antiviral by interacting to MZF1 and targeting the core promoter of the hepatitis B virus gene
Source: PubMed Central journal article supplement (PMC11346786; doi:10.18632/aging.206047), 2024-08-10
Supplement: aging-16-206047-s002.pdf [file aging-16-206047-s002.pdf]

SUPPLEMENTARY FIGURE

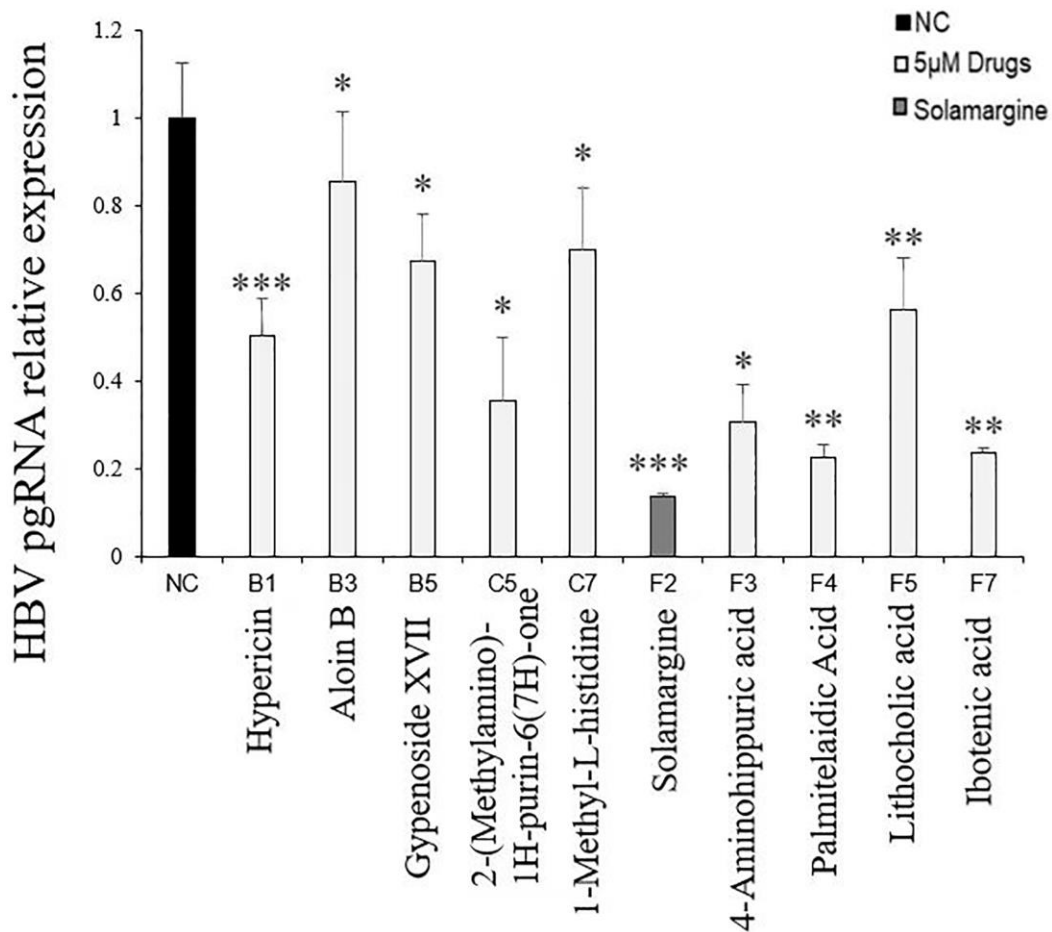

Supplementary Figure 1. Natural compounds exhibited anti-HBV pgRNA effect.
